## CORRESPONDENCE

Anesthesiology

1996; 84:1520

© 1996 American Society of Anesthesiologists, Inc.  
Lippincott-Raven Publishers

*In Reply:*—Both Waltuck and Pas speculate that the administration of epinephrine in the epidural local anesthetic solution was a likely contributing factor to the neurologic deficit observed in our case. We contend that there is no scientific evidence to support this assumption. We are unaware of any research data in humans examining the relation of epinephrine administered by either the subarachnoid or epidural route to spinal cord blood flow. On the contrary, in an animal model, Kozody *et al.*<sup>\*</sup> reported that lumbar subarachnoid injection of 200  $\mu$ g epinephrine had no effect on spinal cord blood flow in the cervical, thoracic, and lumbosacral regions. It should be noted that 200  $\mu$ g epinephrine frequently is administered with local anesthetics in the subarachnoid area to augment surgical anesthesia in a wide variety of patients (including patients with severe peripheral vascular disease) without apparent detrimental neurologic effects. Given that the total dose of epinephrine used in our case was 40  $\mu$ g and given the lack of support from either clinical observation or animal studies of adverse outcome with neuraxial (epidural or subarachnoid) administration of epinephrine on spinal cord blood flow, we suggest that the contribution of epinephrine in this case remains speculative and highly unlikely.

We do not regard the selection of a thoracic epidural for postoperative analgesia in this case as either "overzealous" or "aggressive."

\* Kozody R, Palahniuk RJ, Wade JG, Cumming MO: The effect of subarachnoid epinephrine and phenylephrine on spinal cord blood flow. *Can Anaesth Soc J* 1984; 31:503-8.

Anesthesiology

1996; 84:1520-1

© 1996 American Society of Anesthesiologists, Inc.  
Lippincott-Raven Publishers

## Hotline Fluid Warming Fails to Maintain Normothermia

*To the Editor:*—In recent months, *ANESTHESIOLOGY* and other journals have carried advertisements from Level 1 Technologies, Inc. guaranteeing that 90% of patients in whom Hotline fluid warming is used will arrive in the recovery room with "final temperature  $\geq 36^\circ\text{C}$  or net temperature decrease  $\leq 0.2^\circ\text{C}$ ." The claim that fluid warming alone will maintain normothermia does not agree with much of what is known about perioperative heat balance and seems inconsistent with the laws of thermodynamics.

Intraoperative hypothermia results from a combination of anesthetic-induced inhibition of thermoregulatory control and exposure to a cold environment.<sup>1</sup> Hypothermia during the first hour of surgery results largely from an internal core-to-peripheral redistribution of body heat. Redistribution typically reduces core temperature 0.5–1.5 $^\circ\text{C}$ <sup>2,3</sup> and is difficult to treat even with active cutaneous warming.<sup>4</sup> Subsequently, mean body temperature decreases when heat loss (in-

cluding that required to warm administered fluids) exceeds metabolic heat production.<sup>4</sup> During this phase, core temperature is most influenced by cutaneous insulation/heating, fluid warming, and other manipulations altering heat balance. Because radiative and evaporative losses associated with surgery can be enormous,<sup>5</sup> active warming usually is required to prevent hypothermia.<sup>6,7</sup>

**Dermot R. Fitzgibbon, M.B., B.Ch., F.F.A.R.C.S.I.**  
Acting Assistant Professor  
**L. Brian Ready, M.D., F.R.C.P.(C.)**  
Professor and Director of Pain Service  
Department of Anesthesiology  
University of Washington Medical Center  
Seattle, Washington 98105

## Reference

1. Kavanagh BP, Katz J, Sandler AN: Pain control after thoracic surgery: A review of current techniques. *ANESTHESIOLOGY* 1994; 81: 737-59

(Accepted for publication March 5, 1996.)

cluding that required to warm administered fluids) exceeds metabolic heat production.<sup>4</sup> During this phase, core temperature is most influenced by cutaneous insulation/heating, fluid warming, and other manipulations altering heat balance. Because radiative and evaporative losses associated with surgery can be enormous,<sup>5</sup> active warming usually is required to prevent hypothermia.<sup>6,7</sup>

One liter of crystalloid at ambient temperature or a unit of refrigerated blood reduces mean body temperature  $\approx 0.25^\circ\text{C}$  in adults. It is therefore easy to cool patients by administering unwarmed intravenous fluids. Conversely, it is not possible to significantly warm patients by administering heated intravenous fluids. The reason is that intravenous fluid temperature cannot much exceed  $40^\circ\text{C}$  without harming blood cells.

Heat transferred by fluid warming therefore can be calculated as the difference between fluid and mean body temperature multiplied



## CORRESPONDENCE

by the volume of fluid. For example, administration of 2 l of fluid at 40°C to a patient with a mean body temperature of 36°C increases body heat content 8 kcal. Assuming a patient weight of 70 kg and a tissue specific heat of  $0.86 \text{ cal} \cdot ^\circ\text{C}^{-1} \cdot \text{g}^{-1}$ ,<sup>8</sup> 8 kcal will increase mean body temperature only 0.1°C. This trivial amount of warming will rarely compensate for ongoing cutaneous and surgical losses.<sup>4,5</sup> Heat delivered by warmed fluids has the advantage of being directly inserted into the core thermal compartment; it is, of course, rapidly dissipated to peripheral tissues.

The Hotline warmer improves conventional designs by preventing fluid cooling within intravenous tubing. However, the amount of cooling at typical flow rates is of no consequence in adults.<sup>9</sup> In addition, this design compromises efficacy, and the device warms fluids only to 38°C at a flow rate of 1 l/h.<sup>10</sup> The above calculation thus overestimates the benefits of Hotline warming.

To evaluate the Level 1 Technologies, Inc. claim, I conducted the following study. With Institutional Review Board approval, distal esophageal temperature (probes: RSP, Inc., Irvine, CA; monitor: SpaceLabs, Redmond, WA) was measured in all patients aged 18 yr or older to whom I administered general anesthesia during a 1-month period (excluding those undergoing cardiopulmonary bypass). Anesthesia was induced with fentanyl, methohexital, and rocuronium and maintained with desflurane in oxygen. Total fresh gas flow was 900 ml/min; ventilation was controlled to an end-tidal  $\text{PCO}_2$  near 35 mmHg in others. Ambient temperature was  $19.3 \pm 1.3^\circ\text{C}$  (normal at NT Enloe Hospital), and the patients were covered with a single layer of surgical drape.<sup>11</sup> Fluids were administered at a rate of  $10 \text{ ml} \cdot \text{kg}^{-1} \cdot \text{h}^{-1}$ , always using a Hotline warmer.

Twenty-two patients had surgery lasting at least 1 h ( $1.5 \pm 0.7 \text{ h}$  (mean  $\pm$  SD); among these, only seven underwent open abdominal procedures. Final core temperatures averaged  $35.7 \pm 0.4^\circ\text{C}$  and equaled or exceeded 36°C in only six. In addition, the decrease in core temperature exceeded 0.2°C in all but two cases. Consequently, 68% of the cases failed to meet the criteria "absolutely guaranteed" by Level 1 Technologies, Inc. To their credit, and as offered in the advertisement, a representative of Level 1 Technologies, Inc. immediately offered to refund the purchase price of the Hotline unit and replace the disposable materials. Nonetheless, my results suggest that the Level 1 Technologies, Inc. advertisement is based more on wishful thinking than usual clinical experience.

It would be relatively easy to design a study in which use of the Hotline would maintain temperature of patients  $\geq 36^\circ\text{C}$ . Level 1 Technologies, Inc. may be able to cite such a study, although I am not aware that one has been published. Final core temperatures often will exceed 36°C if the study population is restricted to well covered patients<sup>12</sup> undergoing relatively noninvasive procedures<sup>13,14</sup> in a warm environment.<sup>15</sup> Numerous studies demonstrate that fluid warming alone will not maintain normothermia in patients undergoing typical procedures in a typical ( $\approx 19\text{--}21^\circ\text{C}$ ) environment.<sup>4,6,7</sup> My data are consistent with these peer-reviewed publications.

In summary, only  $\approx 32\%$  of patients given fluids warmed with a Hotline were normothermic at the end of surgery. That fluid warming

alone would fail to maintain normothermia is expected from previous studies of intraoperative heat balance and the laws of thermodynamics.

**Victor Werlhof, M.D.**  
Attending Anesthesiologist  
NT Enloe Hospital  
Chico, California 95926

## References

1. Sessler DI: Perianesthetic thermoregulation and heat balance in humans. *FASEB J* 1993; 7:638-44
2. Sessler DI, McGuire J, Moayeri A, Hynson J: Isoflurane-induced vasodilation minimally increases cutaneous heat loss. *ANESTHESIOLOGY* 1991; 74:226-32
3. Just B, Trévien V, Delva E, Lienhart A: Prevention of intraoperative hypothermia by preoperative skin-surface warming. *ANESTHESIOLOGY* 1993; 79:214-8
4. Hynson J, Sessler DI: Intraoperative warming therapies: A comparison of three devices. *J Clin Anesth* 1992; 4:194-9
5. Roe CF: Effect of bowel exposure on body temperature during surgical operations. *Am J Surg* 1971; 122:13-5
6. Kurz A, Kurz M, Poeschl G, Faryniak B, Redl G, Hackl W: Forced-air warming maintains intraoperative normothermia better than circulating-water mattresses. *Anesth Analg* 1993; 77:89-95
7. Borms SF, Engelen SLE, Himpe DGA, Suy MR, Theunissen WJH: Bair Hugger forced-air warming maintains normothermia more effectively than Thermo-Lite insulation. *J Clin Anesth* 1994; 6:303-7
8. Burton AC: Human calorimetry: The average temperature of the tissues of the body. *J Nutr* 1935; 9:261-80
9. Lee J, Mintz PD: A method for estimating the delivery temperature of intravenous fluids. *Anesth Analg* 1994; 79:155-9
10. Presson RGJ, Bezruczko AP, Hillier SC, McNiece WL: Evaluation of a new fluid warmer effective at low to moderate flow rates. *ANESTHESIOLOGY* 1993; 78:974-80
11. Sessler DI, McGuire J, Sessler AM: Perioperative thermal insulation. *ANESTHESIOLOGY* 1991; 74:875-9
12. Sessler DI, Schroeder M: Heat loss in humans covered with cotton hospital blankets. *Anesth Analg* 1993; 77:73-7
13. Guffin A, Girard D, Kaplan JA: Shivering following cardiac surgery: Hemodynamic changes and reversal. *J Cardiothorac Vasc Anesth* 1987; 1:24-8
14. Morris RH, Wilkey BR: The effects of ambient temperature on patient temperature during surgery not involving body cavities. *ANESTHESIOLOGY* 1970; 32:102-7
15. Morris RH: Operating room temperature and the anesthetized, paralyzed patient. *Surgery* 1971; 102:95-7

(Accepted for publication March 5, 1996.)
